# Supplementary material for: One-pot synthesis of CuFeO2 nanoparticles capped with glycerol and proteomic analysis of their nanocytotoxicity against fungi
Source: Royal Society of Chemistry journal article supplement (doi:10.1039/c6ra13396g), 2016-01-01
Supplement: c6ra13396g1.pdf [file c6ra13396g1.pdf]

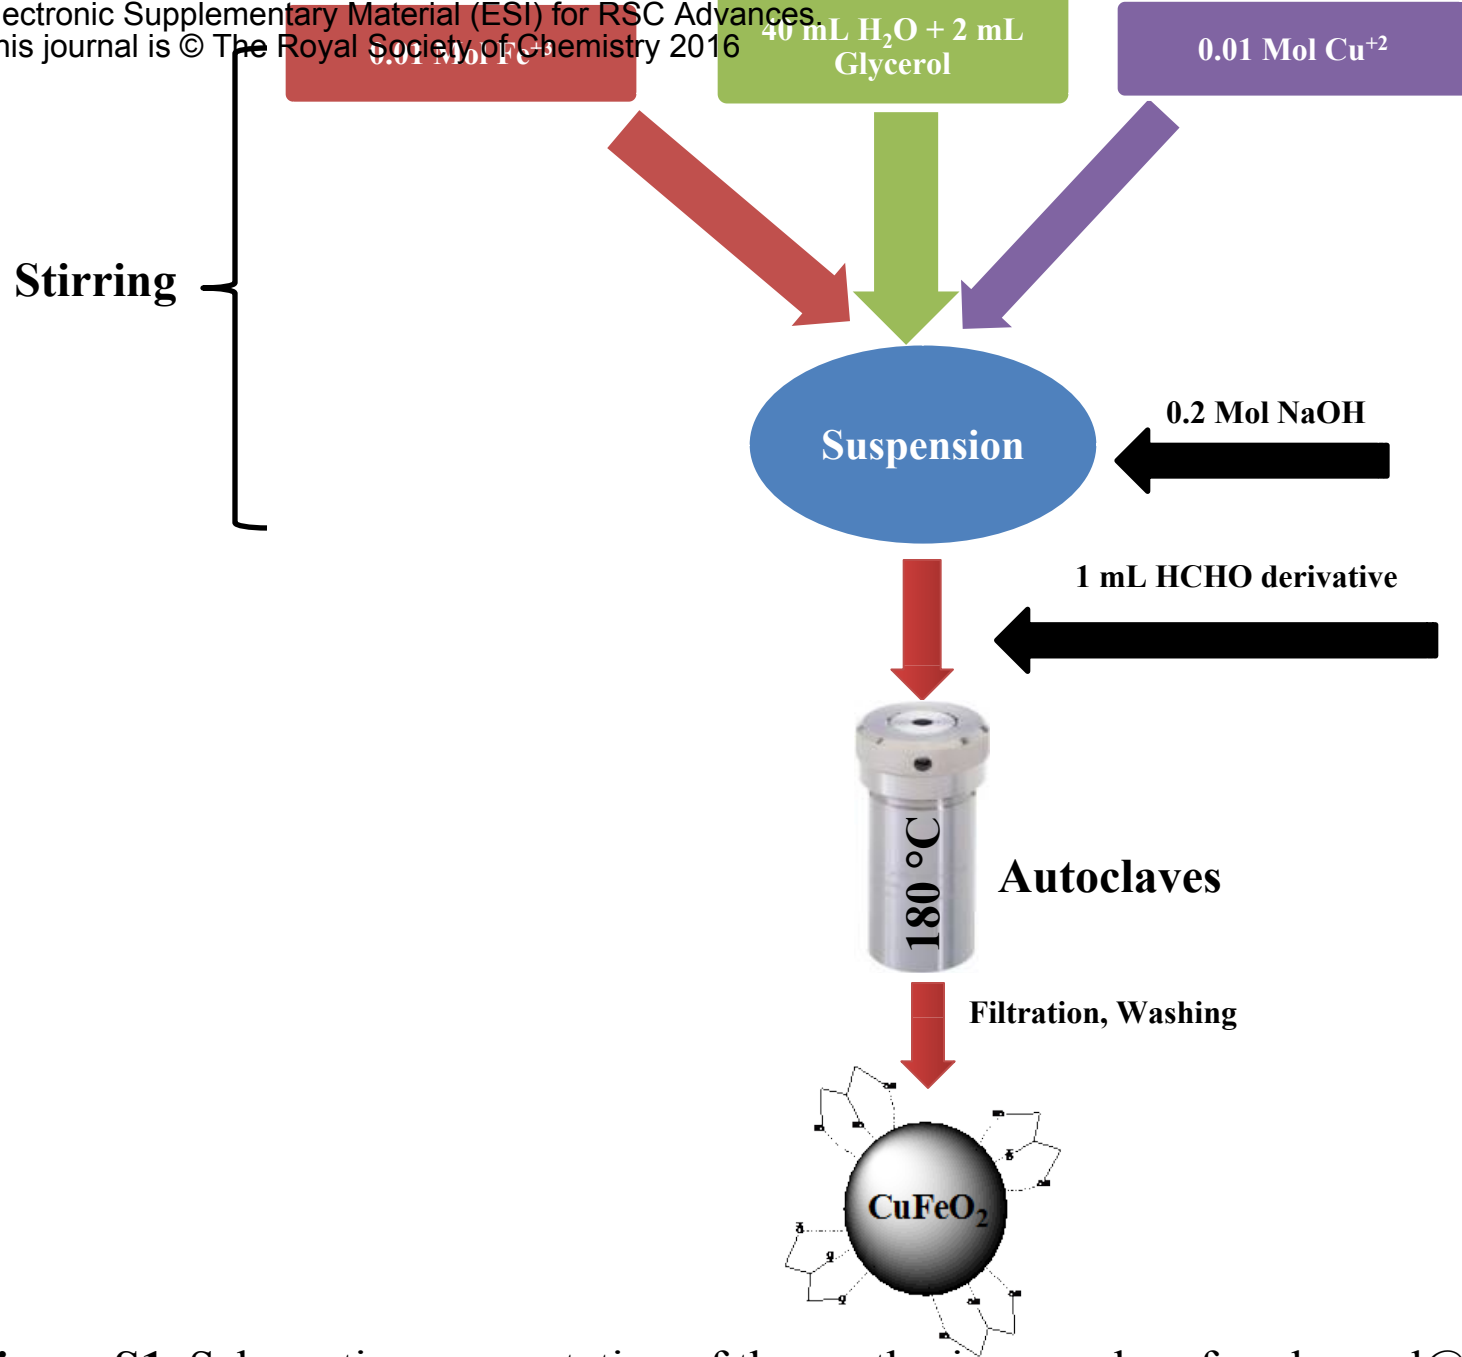

**Figure S1.** Schematic representation of the synthesis procedure for glycerol@CuFeO<sub>2</sub> NPs

**Fig S2**

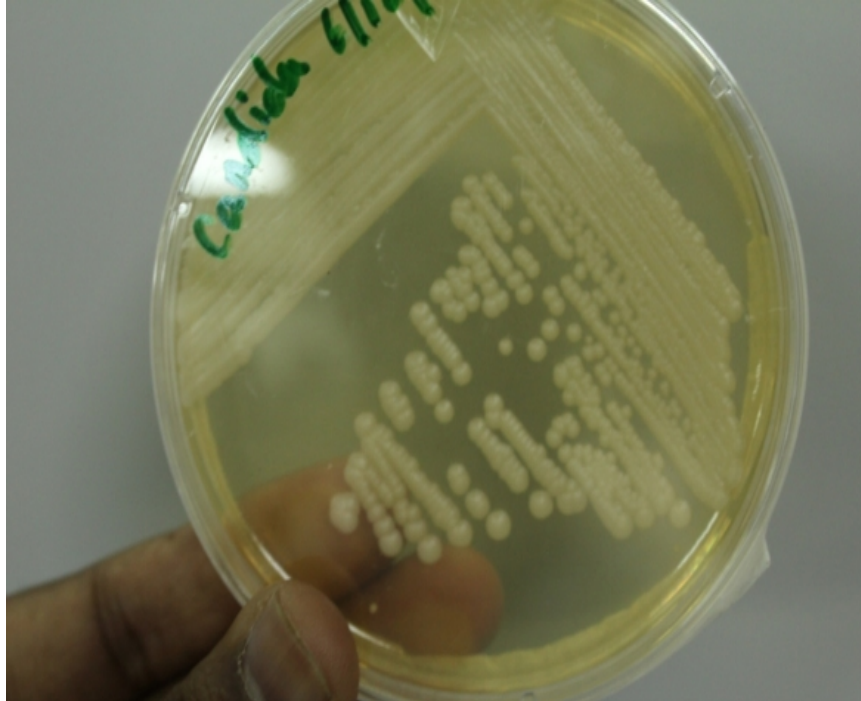

**Fig S2.** *Candida utilis* CCRC 2026 grown on YEPD medium
